# Supplementary material for: Nephrotoxic Metal Mixtures and Preadolescent Kidney Function
Source: MDPI journal article supplement (doi:10.3390/children8080673), 2021-08-02
Supplement: s1 [file s1]

## Supplemental Information

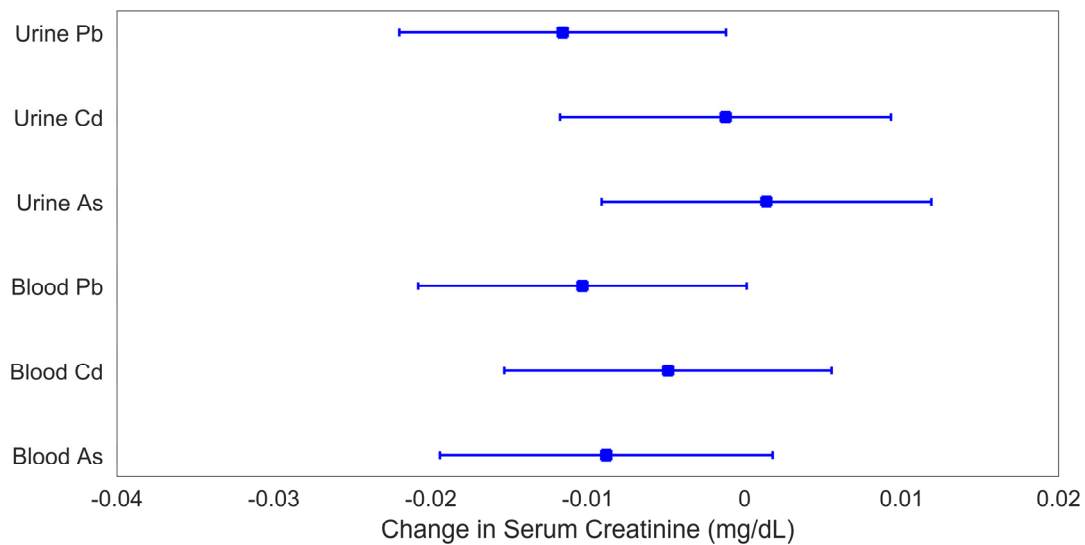

**Figure S1:** Change in serum creatinine (mg/dL) for a 1-quartile increase in metals levels. Plotted points are beta coefficients and lines are 95% confidence intervals. All models were adjusted for child age (years), child sex, indoor tobacco smoke exposure (referent group: no), SES (referent group: lower), and BMI (referent group: BMI z-score<1). The p-values for these associations are: 0.03 (urine Pb), 0.82 (urine Cd), 0.80 (urine As), 0.05 (blood Pb), 0.36 (blood Cd), 0.10 (blood As).

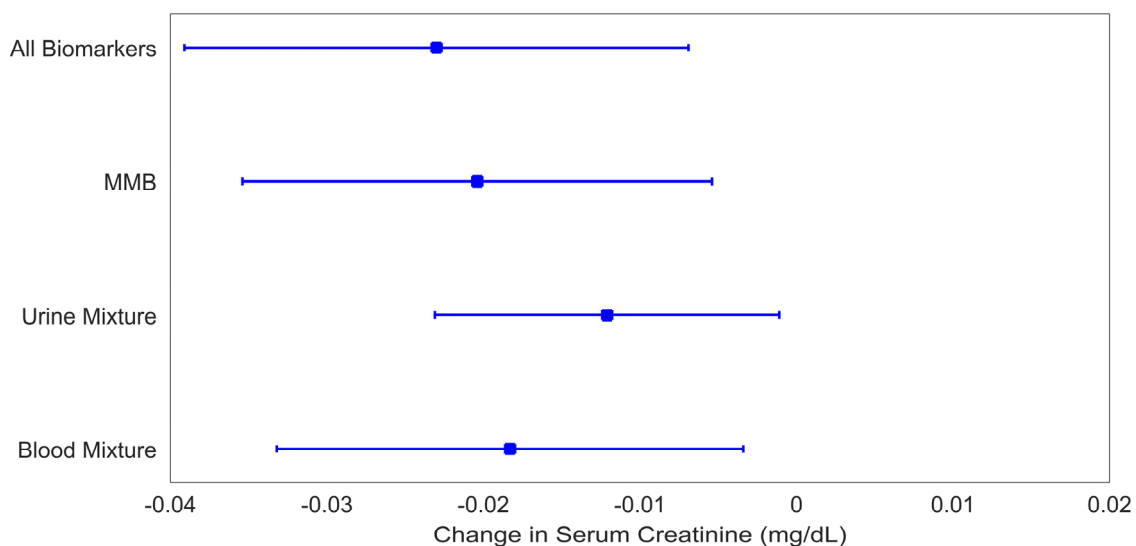

**Figure S2:** Change in serum creatinine (mg/dL) for a 1-quartile increase in metal levels. Plotted points are beta coefficients and lines are 95% confidence intervals. All models were adjusted for child age (years), child sex, indoor tobacco smoke exposure (referent group: no), SES (referent group: lower), and BMI (referent group: BMI z-score<1). The p-values for these associations are: 0.005 (all biomarkers), 0.008 (MMB), 0.03 (urine mixture), and 0.02 (blood mixture).

**Table S1:** Weights highlighting the contribution of each metal to the mixture effect of metals on serum creatinine. Larger weights indicated higher contributions to the mixture effect.

|    | Blood Mixture<br>(B <sub>mix</sub> ) | Urine Mixture<br>(U <sub>mix</sub> ) | MMB | All Biomarkers |
|----|--------------------------------------|--------------------------------------|-----|----------------|
| As | 39%                                  | 9%                                   | 35% | 30%            |
| Cd | 18%                                  | 2%                                   | 17% | 16%            |
| Pb | 44%                                  | 88%                                  | 48% | 54%            |

**Table S2:** Weights highlighting the contribution of each biomarker to the mixture effect of metals on serum creatinine. Larger weights indicated higher contributions to the mixture effect.

|       | As MMB | Cd MMB | Pb MMB | MMB Overall | All Biomarkers |
|-------|--------|--------|--------|-------------|----------------|
| Blood | 97%    | 73%    | 42%    | 67%         | 62%            |
| Urine | 3%     | 27%    | 58%    | 33%         | 38%            |
